# Supplementary material
Source: Elsevier journal article supplement (https://www.sciencedirect.com/science/article/pii/S1578219019300022)
Supplement: mmc1 [file S1578219019300022:mmc1.pdf]

## Encuesta de Opinión sobre Fotografía Médica

Estimado paciente:

Para nosotros es importante conocer su opinión y su disposición en relación a la fotografía médica: aquella que el médico hace de ciertas afecciones o lesiones de la piel, por supuesto, si el paciente lo autoriza.

El cuestionario es confidencial, no es necesario que coloque su nombre. Si quiere darnos su opinión, por favor responda las siguientes preguntas:

**1.- ¿Cree que las fotografías médicas son útiles?**

☐ Sí      ☐ No      ☐ No lo sé

**Si cree que lo son, ¿para qué serían útiles?**

**2.- Para el diagnóstico de la lesión en mi persona**

☐ Sí      ☐ No

**3.- Para el diagnóstico de otras personas**

☐ Sí      ☐ No

**4.- Para hacer seguimiento del tratamiento**

☐ Sí      ☐ No

**5.- Para que el médico consulte el caso con colegas**

☐ Sí      ☐ No

**¿Autorizaría usted la fotografía en las siguientes circunstancias?**

**6.- La lesión es grave - maligna**

☐ Si autorizaría      ☐ No autorizaría      ☐ Tendría dudas

**7.- La lesión es grande - extensa**

☐ Si autorizaría      ☐ No autorizaría      ☐ Tendría dudas

**8.- La lesión está localizada en la cara**

☐ Si autorizaría      ☐ No autorizaría      ☐ Tendría dudas

**9.- La lesión se localiza en los genitales**

☐ Si autorizaría      ☐ No autorizaría      ☐ Tendría dudas

**10.- Las fotografías serán tomadas por su médico**

☐ Si autorizaría      ☐ No autorizaría      ☐ Tendría dudas

**11.- Las fotografías serán tomadas por otro médico**

☐ Si autorizaría      ☐ No autorizaría      ☐ Tendría dudas

**12.- Las fotografías serán tomadas por una enfermera o enfermero**

☐ Si autorizaría      ☐ No autorizaría      ☐ Tendría dudas

**13.- Las fotografías serán hechas por un fotógrafo**

☐ Si autorizaría      ☐ No autorizaría      ☐ Tendría dudas

**14.- Otros motivos por los que dudaría (explique)**

---

---

---

---

---

**15.- ¿Alguno de sus médicos ya le ha tomado fotografías de su piel?**

☐ Si ☐ No

**16.- ¿Algún médico ha tomado fotos de la piel de algún familiar?**

☐ Si ☐ No ☐ No lo se

**17.- Si en las próximas consultas el médico le solicita autorización para fotografiar alguna lesión de su piel, ¿le autorizaría?**

Marque solo una de las tres posibilidades.

☐ Si, sin duda lo autorizaría ☐ No lo sé. Tendría dudas ☐ No lo autorizaría

**18.- En caso de no autorizar, ¿cuáles serían los motivos?**

Marque todos los que correspondan a su situación

|                                                         |                                                                     |                                                                    |
|---------------------------------------------------------|---------------------------------------------------------------------|--------------------------------------------------------------------|
| <input type="checkbox"/> No me gusta que me tomen fotos | <input type="checkbox"/> Mi religión no me permite ser fotografiado | <input type="checkbox"/> Desconfío del uso que se dará a las fotos |
|---------------------------------------------------------|---------------------------------------------------------------------|--------------------------------------------------------------------|

**19.- Otros motivos por los que no autorizaría (explique)**

---

---

---

---

---

**Para terminar, algunos datos sobre usted**

**20.- Servicio al que acude hoy**

---

21.- Edad

22.- Sexo Varón  Mujer

23.- Estado Civil  Soltero/a  Casado/a  
 Divorciado/a  Viudo/a  
 Viviendo en pareja

24.- Último grado de estudios \_\_\_\_\_

25.- Ciudad o pueblo de residencia \_\_\_\_\_

26.- País de origen \_\_\_\_\_

27.- Ocupación actual \_\_\_\_\_

28.- Si es pensionista, ocupación que  
desempeñaba al retirarse \_\_\_\_\_

29.- Cuál es su religión? \_\_\_\_\_

30.- ¿Es usted practicante de su religión? ☐ Si ☐ No

Muchas gracias por su tiempo
